# Supplementary material for: Antarctic permafrost processes and antiphase dynamics of cold-based glaciers in the McMurdo Dry Valleys inferred from 10 Be and 26 Al cosmogenic nuclides
Source: Copernicus journal article supplement (doi:10.5194/tc-17-4917-2023), 2023-11-24
Supplement: Supplementary file 1 [file tc-17-4917-2023-supplement.zip]

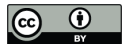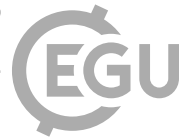

*Supplement of*

**Antarctic permafrost processes and antiphase dynamics of cold-based glaciers in the McMurdo Dry Valleys inferred from  $^{10}\text{Be}$  and  $^{26}\text{Al}$  cosmogenic nuclides**

**Jacob T. H. Anderson et al.**

*Correspondence to:* Jacob T. H. Anderson ([jacob.anderson@otago.ac.nz](mailto:jacob.anderson@otago.ac.nz))

- [tc-17-4917-2023-supplement-title-page.pdf](#)
- Anderson et al Supplementary Data
  - [Anderson et al Supplementary Data.pdf](#)
  - [Table S1.xlsx](#)
  - [Table S2.xlsx](#)

The copyright of individual parts of the supplement might differ from the article licence.
