# Supplementary material for: Antarctic permafrost processes and antiphase dynamics of cold-based glaciers in the McMurdo Dry Valleys inferred from 10 Be and 26 Al cosmogenic nuclides
Source: Copernicus journal article supplement (doi:10.5194/tc-17-4917-2023), 2023-11-24
Supplement: Supplementary file 2 [file tc-17-4917-2023-supplement.zip]

## Supplementary Data

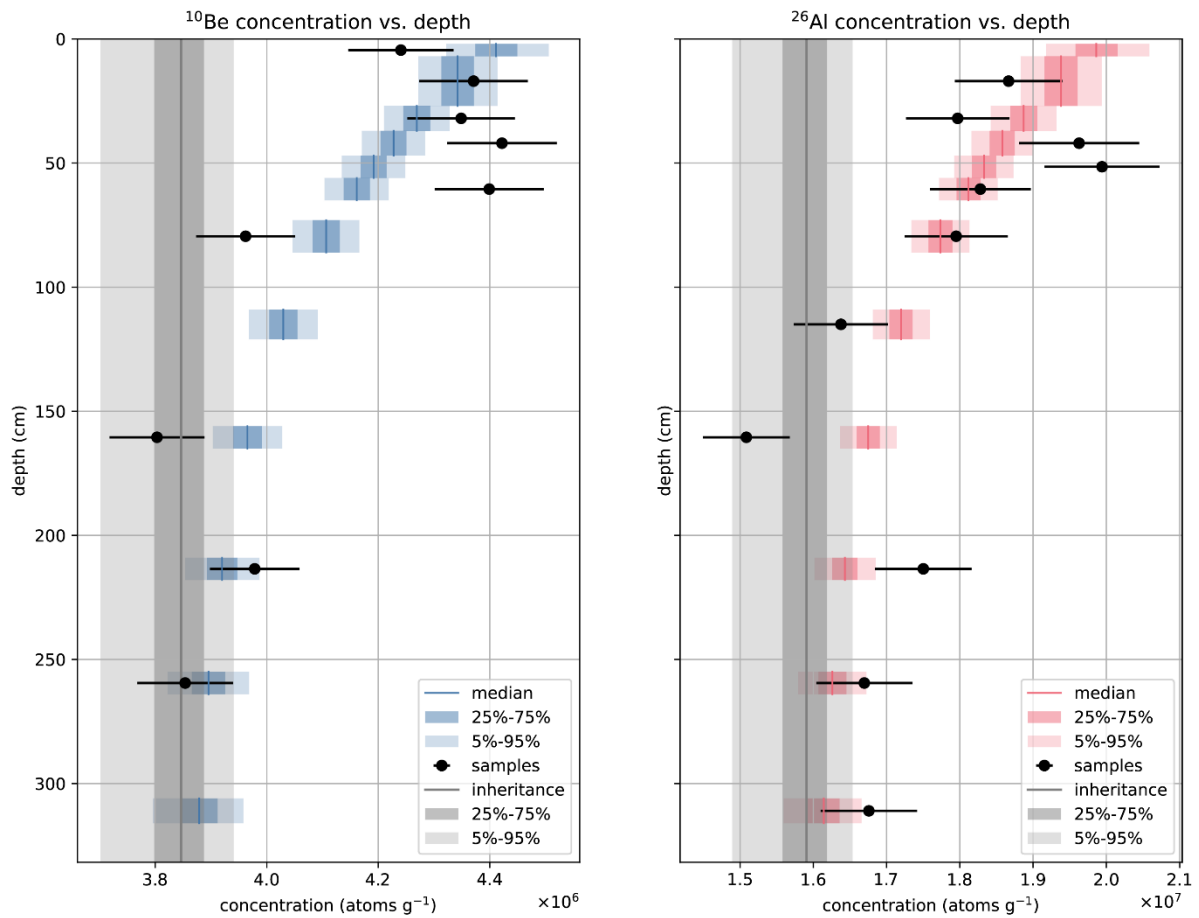

**Figure S1.** Pearse Valley (PV14-A) permafrost core depth profiles with measured <sup>10</sup>Be and <sup>26</sup>Al concentrations (black data points) with 1σ uncertainties for all samples between 0.02–3.16 m depth. Blue (<sup>10</sup>Be) and red (<sup>26</sup>Al) boxes show simulated nuclide concentrations at each sample depth.

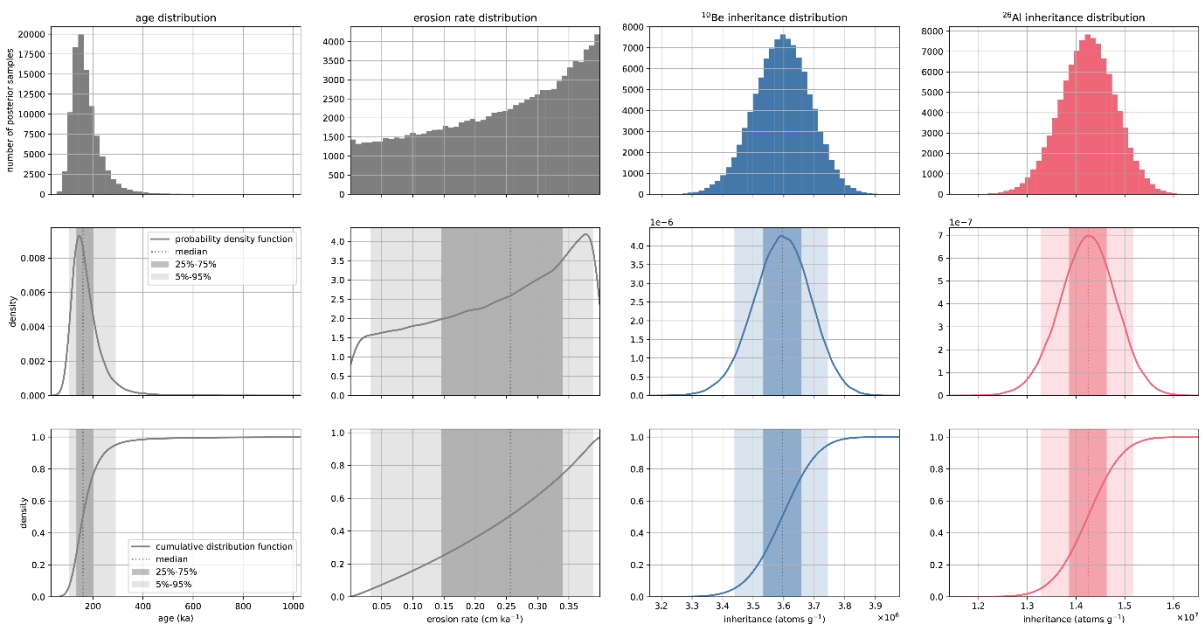

**Figure S2.** Probability density function, and cumulative distribution function for exposure age, erosion rate and inheritance using dual-nuclide depth profile modelling for PV14-A (0.02 – 1.65 m). Showing 25<sup>th</sup> to 75<sup>th</sup> and 5<sup>th</sup> to 95 percentiles. For all samples between 0.02 – 0.65 m depth, we used the average concentration of all measurements for model outputs.

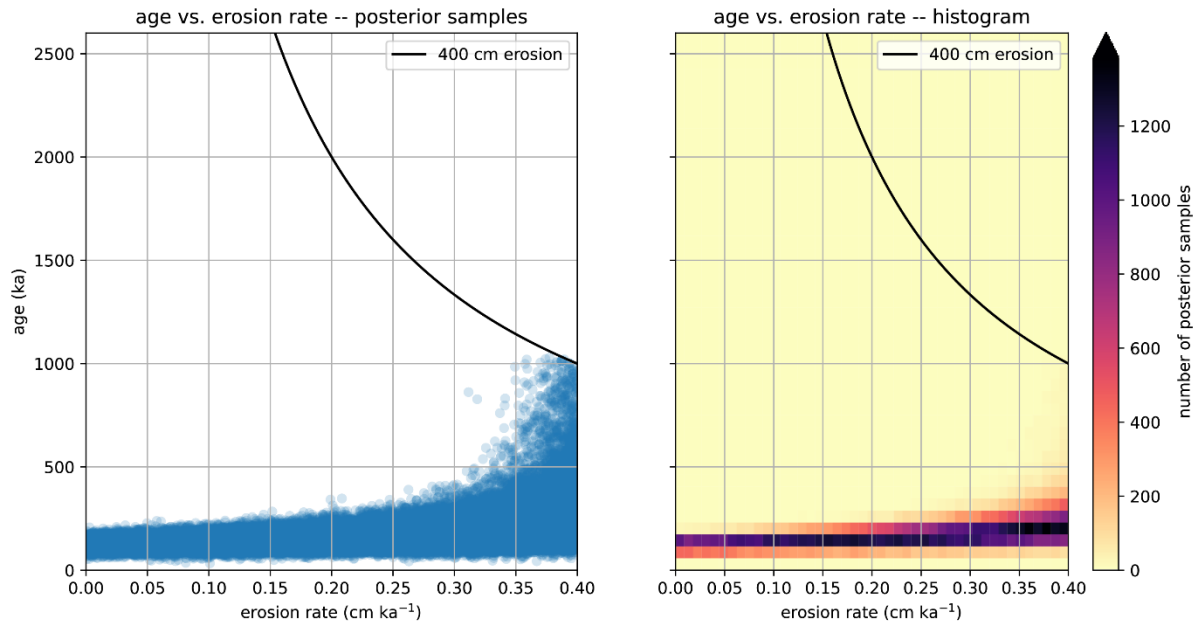

**Figure S3.** Age-erosion rate solution spaces using dual-nuclide depth profile modelling for PV14-A. Left panel shows all posterior profile solutions while right panel shows a histogram of these solutions. Black line indicates 400 cm net erosion limit based on geologic constraints described in Sect. 4.3.

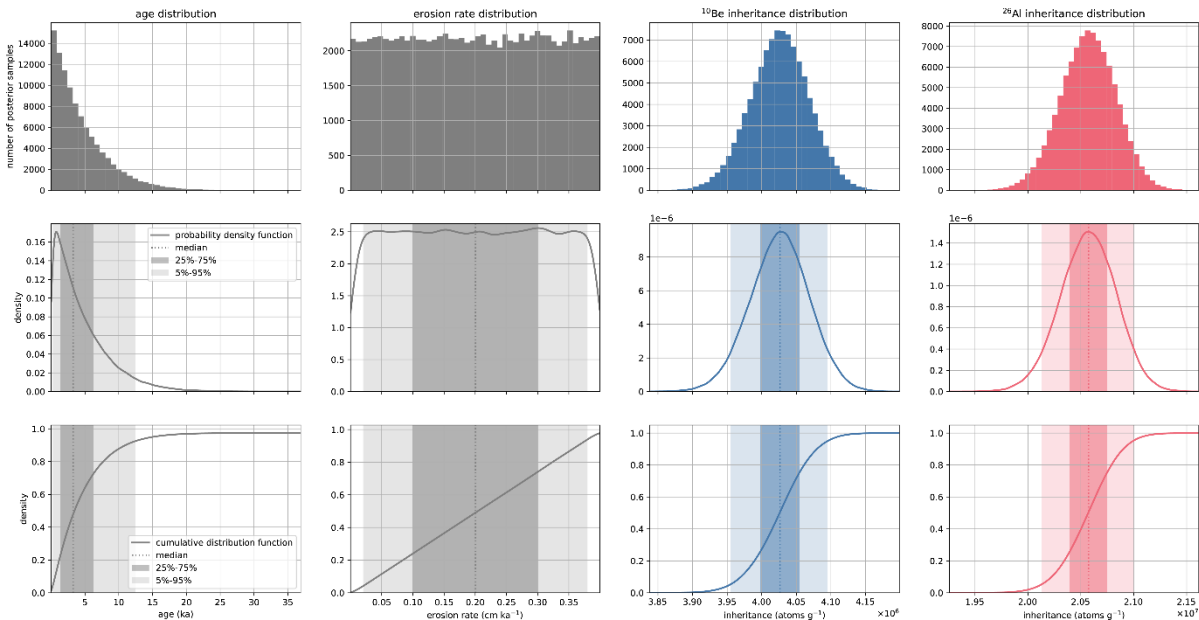

**Figure S4.** Probability density function, and cumulative distribution function for exposure age, erosion rate and inheritance using dual-nuclide depth profile modelling for WV14-I. Showing 25<sup>th</sup> to 75<sup>th</sup> and 5<sup>th</sup> to 95 percentiles.
